# Supplementary material
Source: PubMed Central journal article supplement (PMC9452454)
Supplement: NIHMS1809559-supplement-1.pdf [file NIHMS1809559-supplement-1.pdf]

## SUPPLEMENT – METAMODELING FOR POLICY SIMULATIONS WITH MULTIVARIATE OUTCOMES

ZHONG ET AL.

Table S1. List of input variables for the metamodels

| <b>Variable Name</b>         | <b>Description</b>                                                                                                                                       |
|------------------------------|----------------------------------------------------------------------------------------------------------------------------------------------------------|
| <b>sex_male_prev_v2</b>      | % of the cohort that is male                                                                                                                             |
| <b>age_mon_miu</b>           | Mean age of cohort in months (baseline year = 2015)                                                                                                      |
| <b>age_mon_sd</b>            | Standard deviation of cohort age in months (baseline year = 2015)                                                                                        |
| <b>chronic_hcv_v2</b>        | Among those who are currently in prison or the prison system, estimated prevalence of chronic HCV infection (RNA+)                                       |
| <b>idu_status_none</b>       | % of individuals who have never been injection drug users                                                                                                |
| <b>idu_status_former</b>     | The percentage of the incarcerated population who report having a history of substance use disorder but no current active use                            |
| <b>idu_status_current</b>    | The percentage of the incarcerated population who report having a current, active injection drug use disorder                                            |
| <b>sentence_dur_mon_miu</b>  | Mean sentence duration in months                                                                                                                         |
| <b>sentence_dur_mon_sd</b>   | Standard deviation of sentence duration in months                                                                                                        |
| <b>req_sentsdur_eligible</b> | Minimum sentence duration in months to be eligible for HCV treatment                                                                                     |
| <b>link_care_prison</b>      | Of those identified as having chronic HCV infection, the percentage who link to care in prison for HCV disease staging and treatment                     |
| <b>prob_link_at_release</b>  | Probability of linkage to HCV community care centers when released from prison                                                                           |
| <b>cost_test_anti</b>        | Cost to the prison or prison system of an HCV antibody test; includes the cost of the test reagents as well as any laboratory, staff, and overhead costs |
| <b>cost_test_rna</b>         | Cost to the prison or prison system of an HCV RNA test; includes the cost of the test reagents as well as any laboratory, staff, and overhead costs      |

| <b>Variable Name</b>            | <b>Description</b>                                                                                                                                                                                       |
|---------------------------------|----------------------------------------------------------------------------------------------------------------------------------------------------------------------------------------------------------|
| <b>incid_hcv_corr</b>           | Monthly incidence of HCV infection in prison for injection drug users                                                                                                                                    |
| <b>incid_hcv_comm</b>           | Monthly incidence of HCV infection in the community for injection drug users                                                                                                                             |
| <b>cost_trt_Glec_pib</b>        | Monthly cost of treating HCV infection with glecaprevir/pibrentasvir among patients who have never been treated before and who do not have cirrhosis                                                     |
| <b>cost_trt_Sof_vel</b>         | Monthly cost of treating HCV infection with sofosbuvir/velpatasvir among patients who have never been treated before and who do have cirrhosis                                                           |
| <b>cost_trt_Sof_vel_vox</b>     | Monthly cost for treating HCV infection with sofosbuvir/velpatasvir/voxilaprevir among patients who have previously been treated but did not attain HCV cure and who do not have cirrhosis               |
| <b>cost_trt_Sof_vel_vox_rbv</b> | Monthly cost for treating HCV infection with sofosbuvir/velpatasvir/voxilaprevir/ribavirin among patients who have previously been treated but did not attain hepatitis C cure and who do have cirrhosis |
| <b>lab_test</b>                 | Type of fibrosis staging test (APRI [aspartate aminotransferase to platelet ratio] or fibroscan)                                                                                                         |
| <b>test_specif</b>              | Specificity of fibrosis staging test (given APRI or fibroscan)                                                                                                                                           |
